# Supplementary material
Source: MDPI journal article supplement (https://www.mdpi.com/2673-4591/6/1/91)

# Evaluating Techniques for Joining Piezo-Electric Elements on Test Structures for Performing Vibration-Based Measurement Methods

C. Gundlach, S. Meyer, C. Hopmann, K. Dilger, S. Hartwig  
Technische Universität Braunschweig | Institute of Joining and Welding  
c.gundlach@tu-braunschweig.de | Telefon +49 (0) 531 391-65025

## Motivation & Goal

- Vibration-based measurement methods require vibration coupling between piezo-electric element and test structure
- State of the art: piezo-electric element bonded to structure by using an adhesive (e.g. 2-component epoxy adhesive)
  - + Good vibration transmission
  - + Tried and tested many times in literature
  - Irreversible connection
  - Preparation of the joining surface and curing time
  - Limits flexibility and scope of the test method
- Development and investigation of alternative connection concepts
- Reversible connections, higher flexibility, reuse of piezo element
- Recommendation of a joining technique based on application

## Requirements to joining

|                                             |                                                                                                                                                                              |
|---------------------------------------------|------------------------------------------------------------------------------------------------------------------------------------------------------------------------------|
| Transferring deformations of piezo element  | <ul style="list-style-type: none"> <li>■ Deformations in the order of nanometers</li> <li>■ Transmission for all frequencies from 1 to 45 kHz</li> </ul>                     |
| Influencing vibration characteristics       | <ul style="list-style-type: none"> <li>■ As little influence as possible due to connection</li> <li>■ Vibration behavior characterized by properties of structure</li> </ul> |
| Sensitivity                                 | <ul style="list-style-type: none"> <li>■ High sensitivity of electrical impedance to changes in mechanical impedance of structure</li> </ul>                                 |
| Attaching piezo element                     | <ul style="list-style-type: none"> <li>■ Fast, intuitive, short preparation time, high repeatability</li> </ul>                                                              |
| Material, geometry and surface of structure | <ul style="list-style-type: none"> <li>■ Connection suitable for diverse combinations of material, geometry and surface finish of the structure</li> </ul>                   |
| Ambient temperature                         | <ul style="list-style-type: none"> <li>■ Increased temperatures possible, up to maximum operating temperature of piezo element (half of Curie Temperature)</li> </ul>        |
| Lifetime of connection                      | <ul style="list-style-type: none"> <li>■ High number of load cycles endured</li> <li>■ Ideally service life corresponds to that of piezo element</li> </ul>                  |
| Reversibility                               | <ul style="list-style-type: none"> <li>■ Reversible removal and reuse of the element</li> <li>■ Piezo element and structure will not be damaged</li> </ul>                   |
| Costs per connection                        | <ul style="list-style-type: none"> <li>■ Below cost for piezo element</li> </ul>                                                                                             |

## Concepts for Joining

- New or further development of concepts based on state of the art
- Collecting ideas from literature research and brainstorming

### Form fit

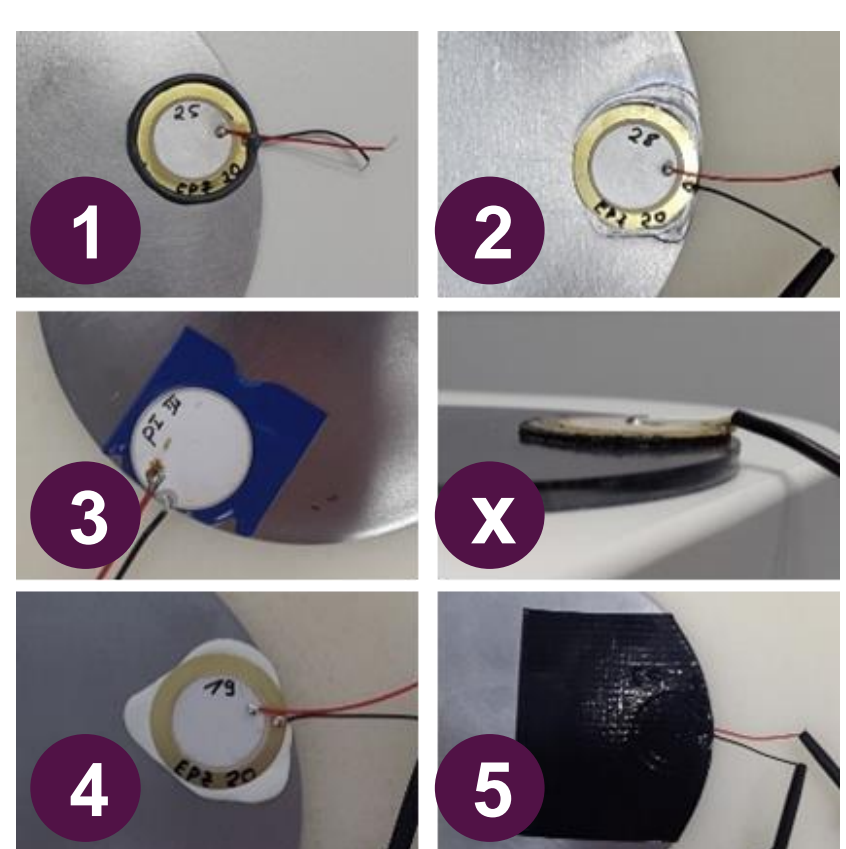

### Friction coupling

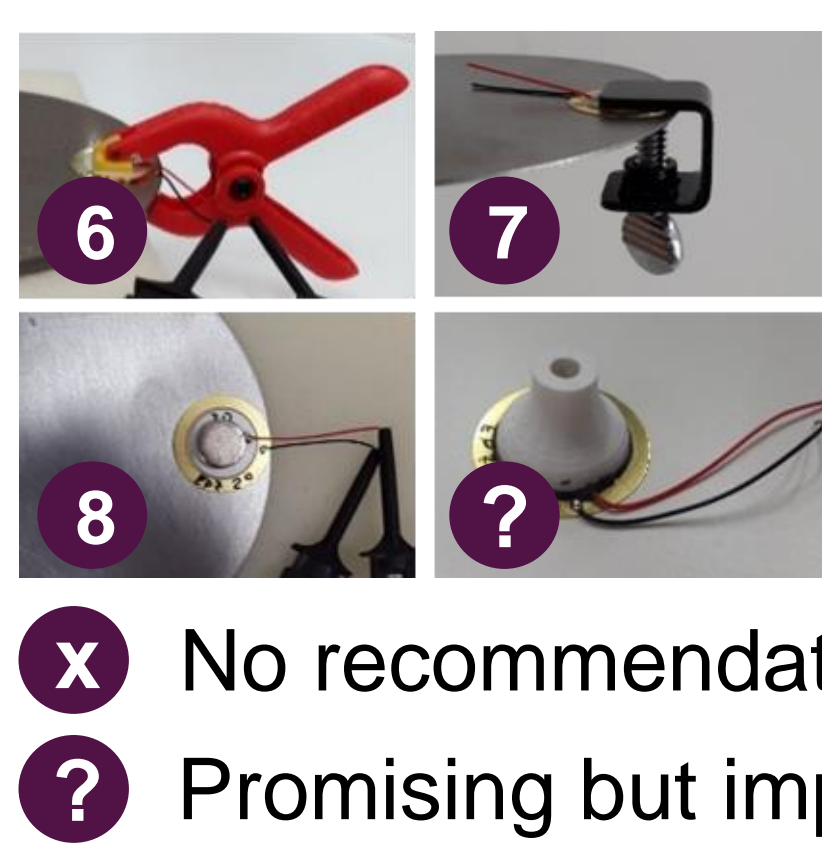

### Adapter concept

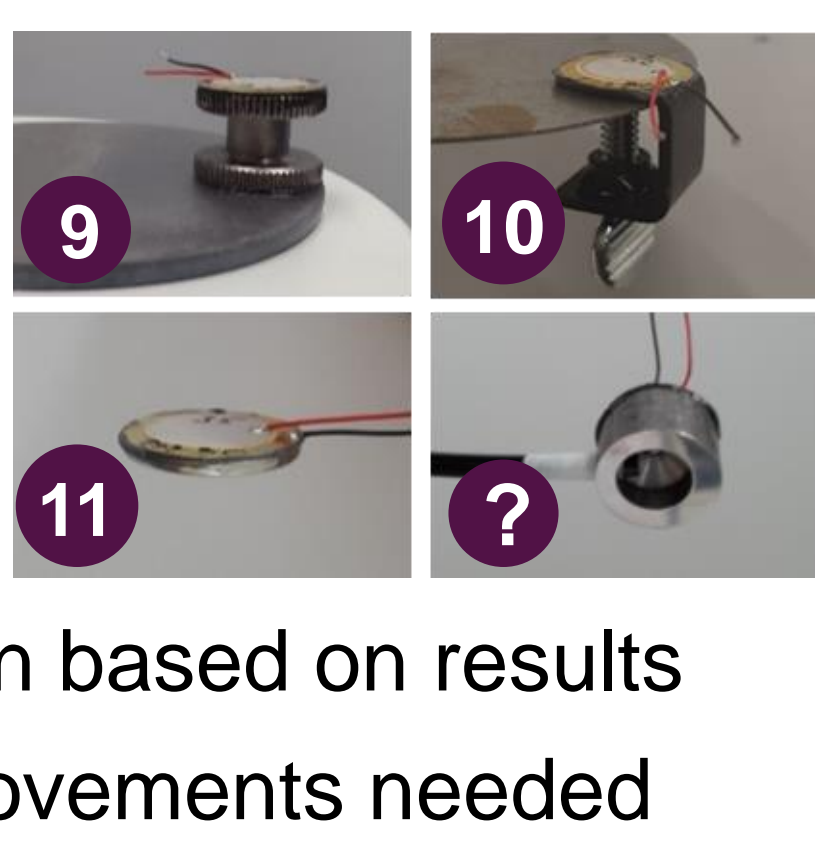

- X No recommendation based on results
- ? Promising but improvements needed

## Experimental Design

- Measurement setup based on Electromechanical Impedance (EMI)
- High- and Low-Cost piezo-electric elements
- Test structures: Blanks made of steel and polystyrene
- For measurement blanks positioned on foam (free storage)
- Obtaining impedance spectra from every joining technique
- Comparison with reference method (2-component epoxy adhesive)
- Evaluation of joining techniques with regard to the fulfillment of the defined requirements

## Conclusion

- Decision diagram derived from experimental results
- Selection of suitable joining technique for different applications
- Force-fit joints only suitable for lower frequency range (< 15 kHz)
- Limited repeatability of reversible methods
- Drift of Impedance spectra with repeated measurement

## Application-based joining

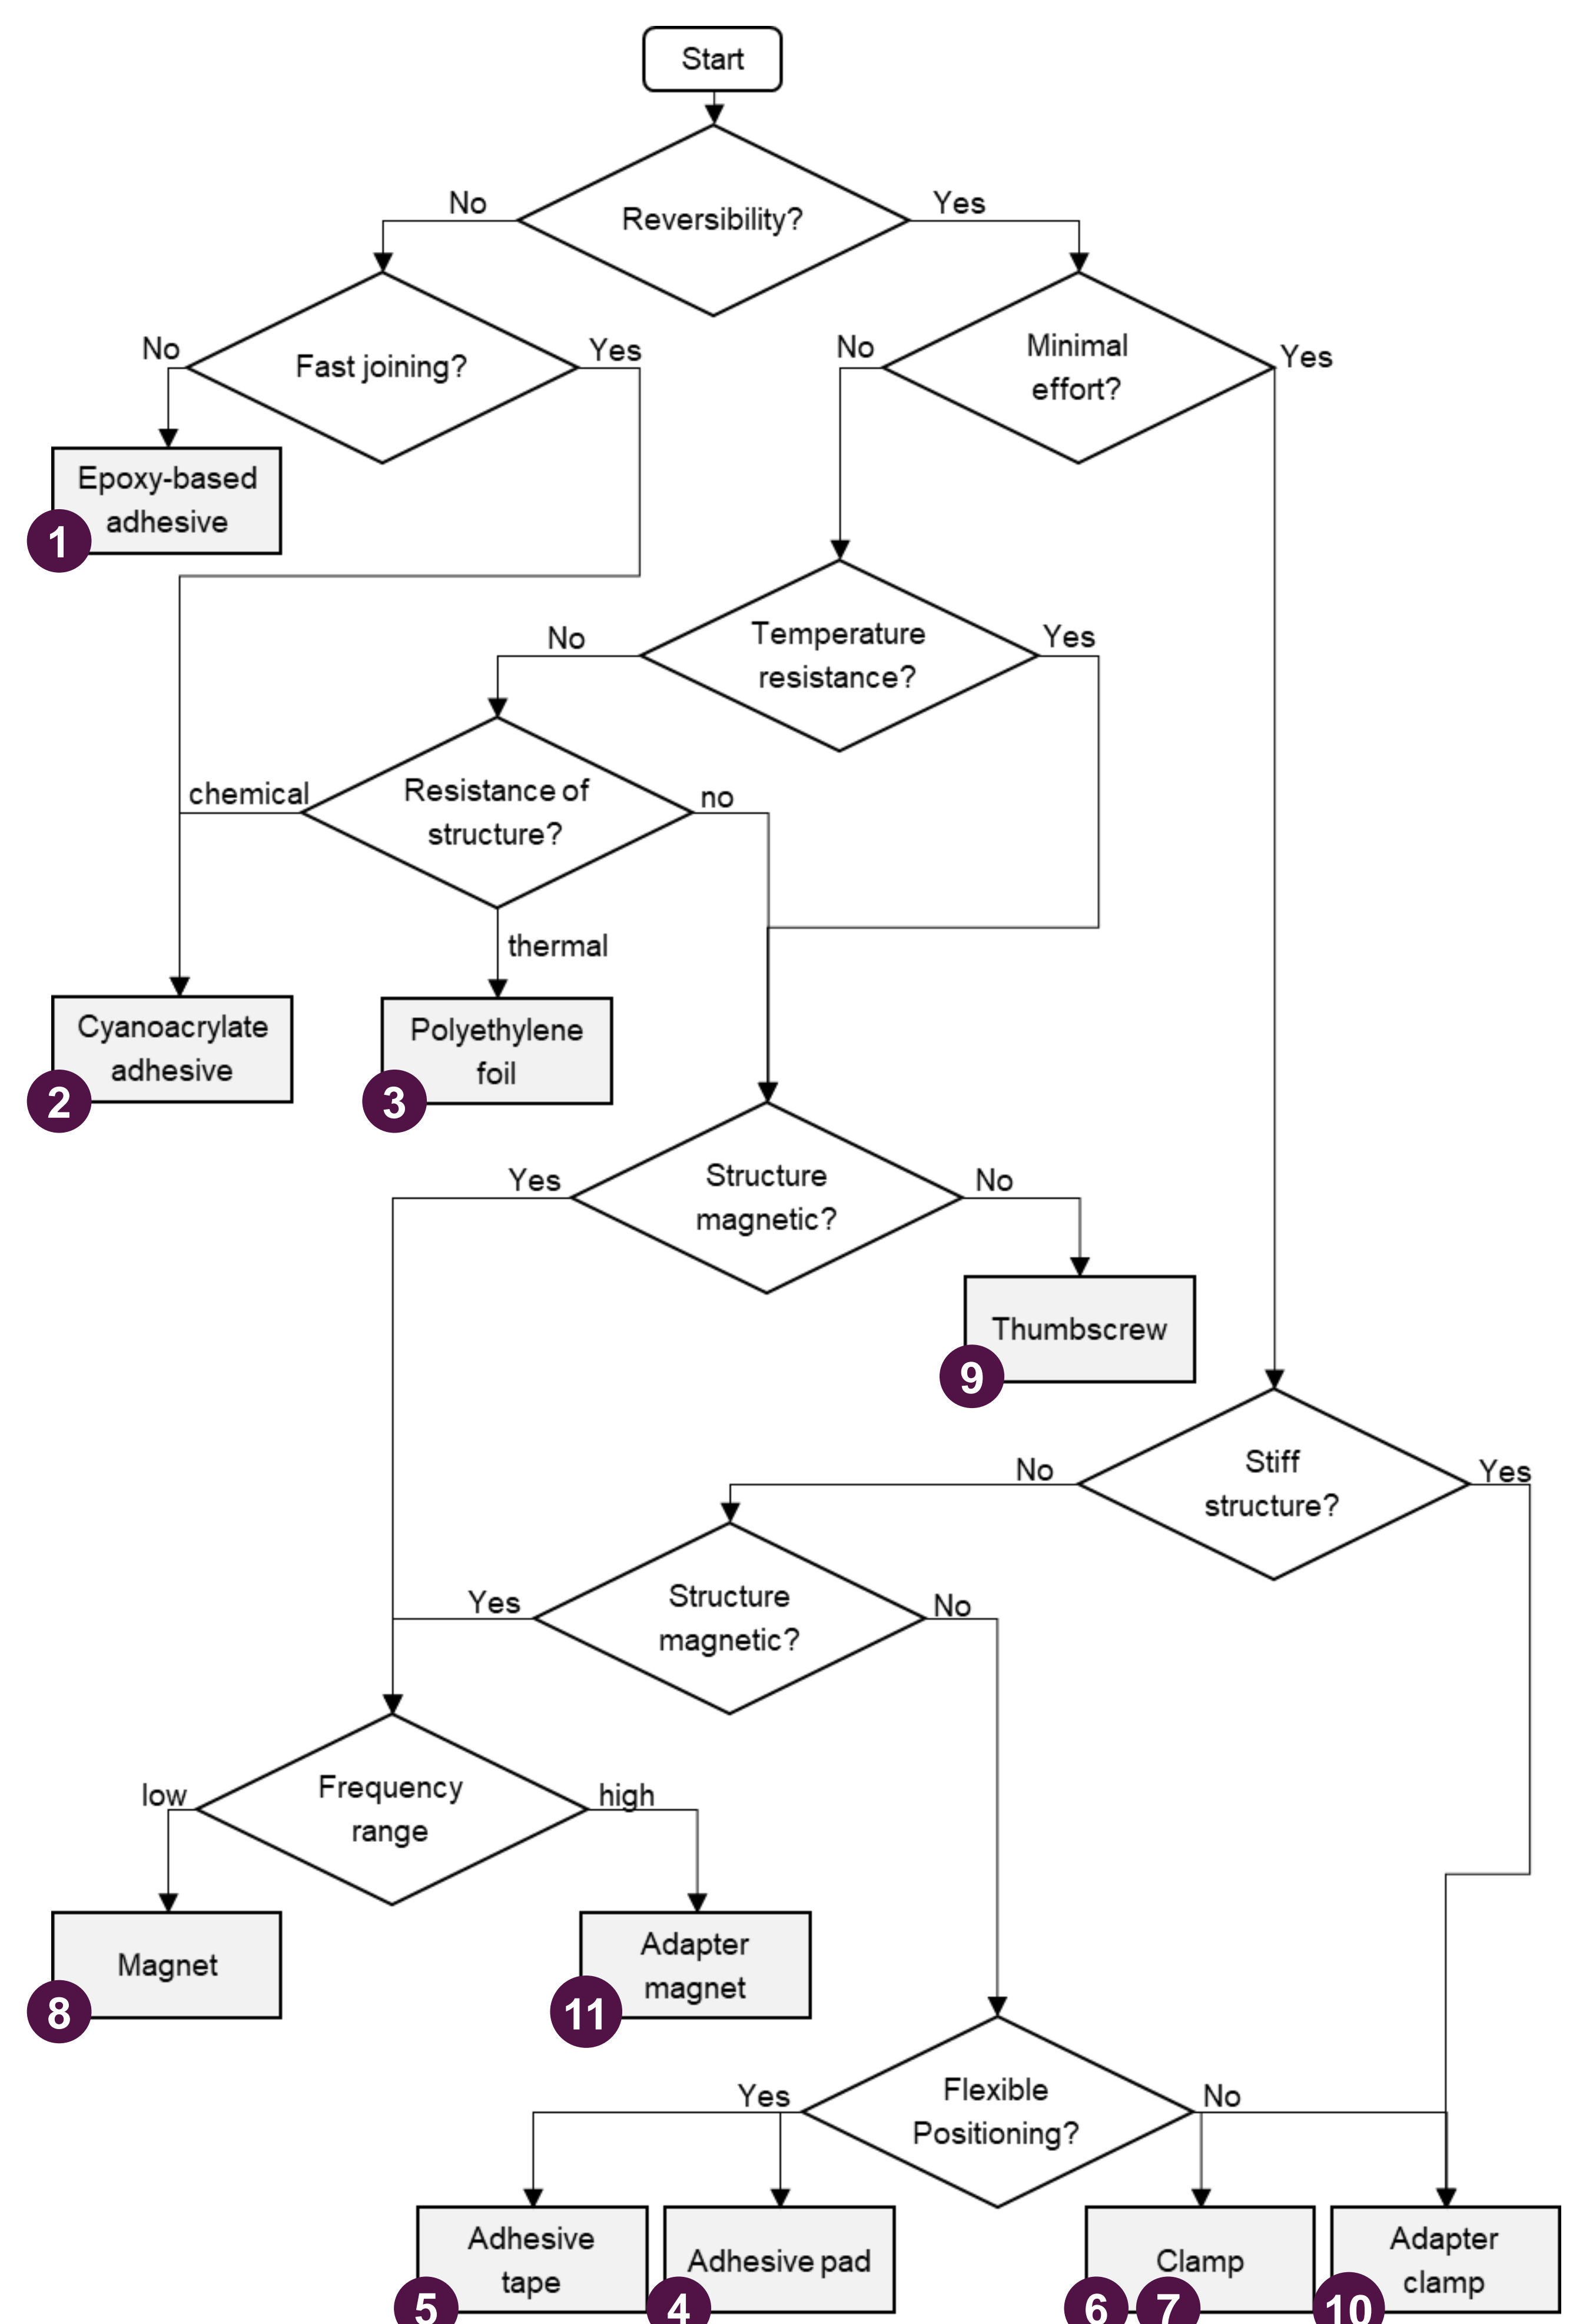

Supplement: s1 [file s1]
